# Supplementary material for: “One-Pot” CuCl2-Mediated Condensation/C–S Bond Coupling Reactions to Synthesize Dibenzothiazepines by Bi-Functional-Reagent N, N′-Dimethylethane-1,2-Diamine
Source: MDPI journal article supplement (doi:10.3390/molecules27217392), 2022-10-31
Supplement: s1 [file s1]

**“One-pot” CuCl<sub>2</sub>-mediated Condensation/C-S Bond Coupling  
Reactions to Synthesize Dibenzothiazepines by Bi-functional-reagent  
N, N'-dimethylethane-1,2-diamine**

**Dehe Wang <sup>1†</sup>, Qichao Lu <sup>1†</sup>, Zhanjun Li <sup>1</sup>, Chen Fang <sup>3</sup>, Ran Liu <sup>1</sup>, Bingchuan Yang <sup>1,4,5\*</sup> and  
Guodong Shen <sup>1,2\*</sup>**

<sup>1</sup> School of Chemistry and Chemical Engineering, Liaocheng University, 1 Hunan Avenue, Liaocheng 252000, Shandong, P. R. China

<sup>2</sup> School of Chemistry and Chemical Engineering, Jinan University, 106 Jiwei Road, Jinan 250022, Shandong, P. R. China

<sup>3</sup> Zhejiang Heze Pharmaceutical Technology, 1 Street, Qiantang New District, Hangzhou, 310000, Zhejiang, P. R. China

<sup>4</sup> School of Chemistry and Chemical Engineering, Shandong University, Jinan 250100, P. R. China

<sup>5</sup> The Department of Chemistry, University of South Florida, 4202 East Fowler Avenue, Tampa, Florida 33620, United States

\*Correspondence: shenguodong33@163.com; yangbingchuan@lcu.edu.cn; Tel.:86-635-8239566;

<sup>†</sup>These authors contributed equally to this work.

## **List of Content**

|                                                   |             |
|---------------------------------------------------|-------------|
| <b>1. Copies of NMR spectra of products .....</b> | <b>1-17</b> |
|---------------------------------------------------|-------------|

## 1. Copies of NMR spectra of products

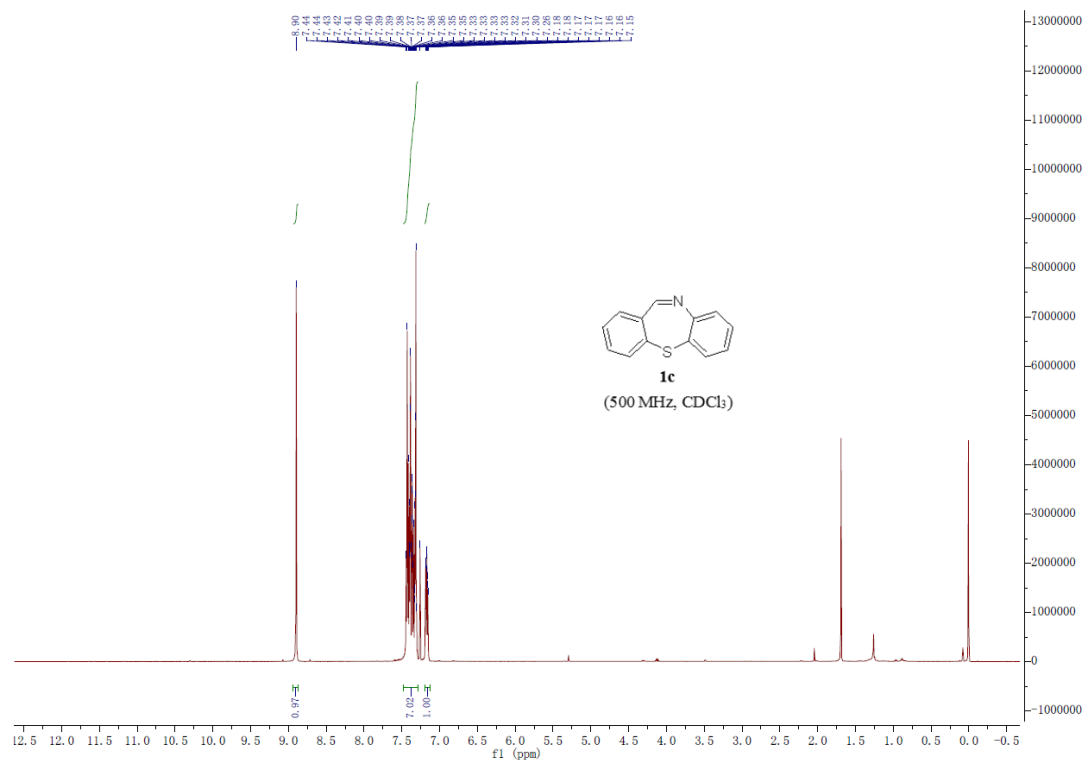

Figure S1: <sup>1</sup>H NMR (CDCl<sub>3</sub>) spectrum of Compound (**1c**)

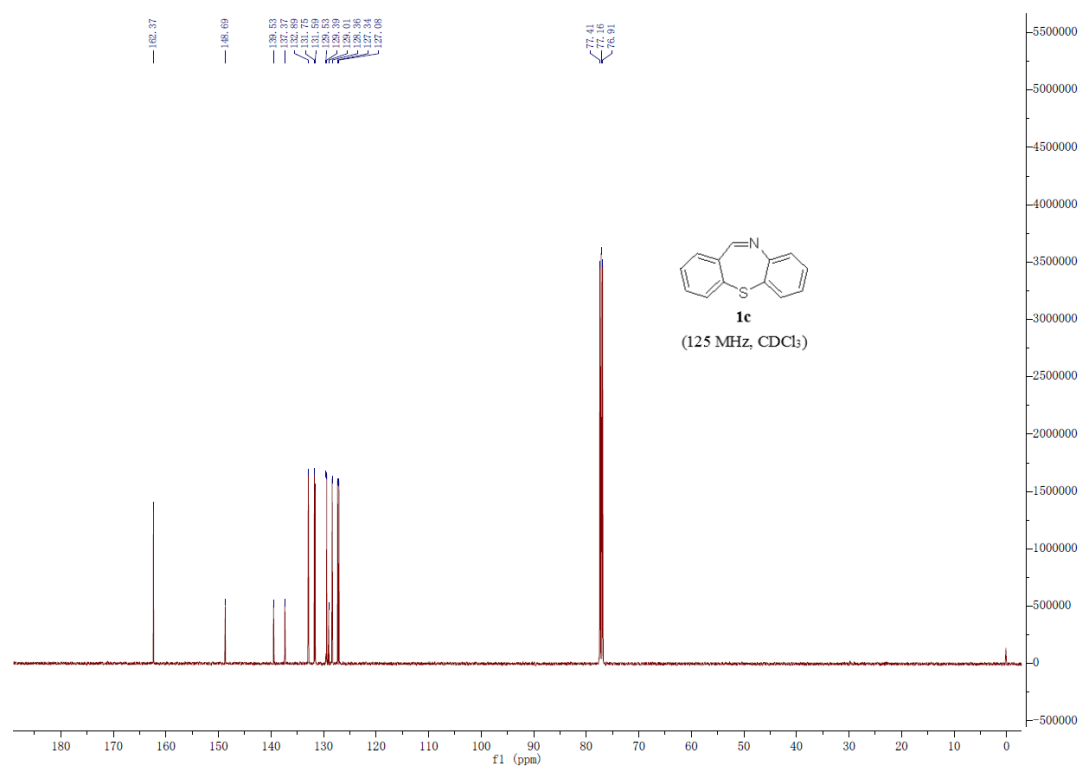

Figure S2: <sup>13</sup>C NMR (CDCl<sub>3</sub>) spectrum of Compound (**1c**)

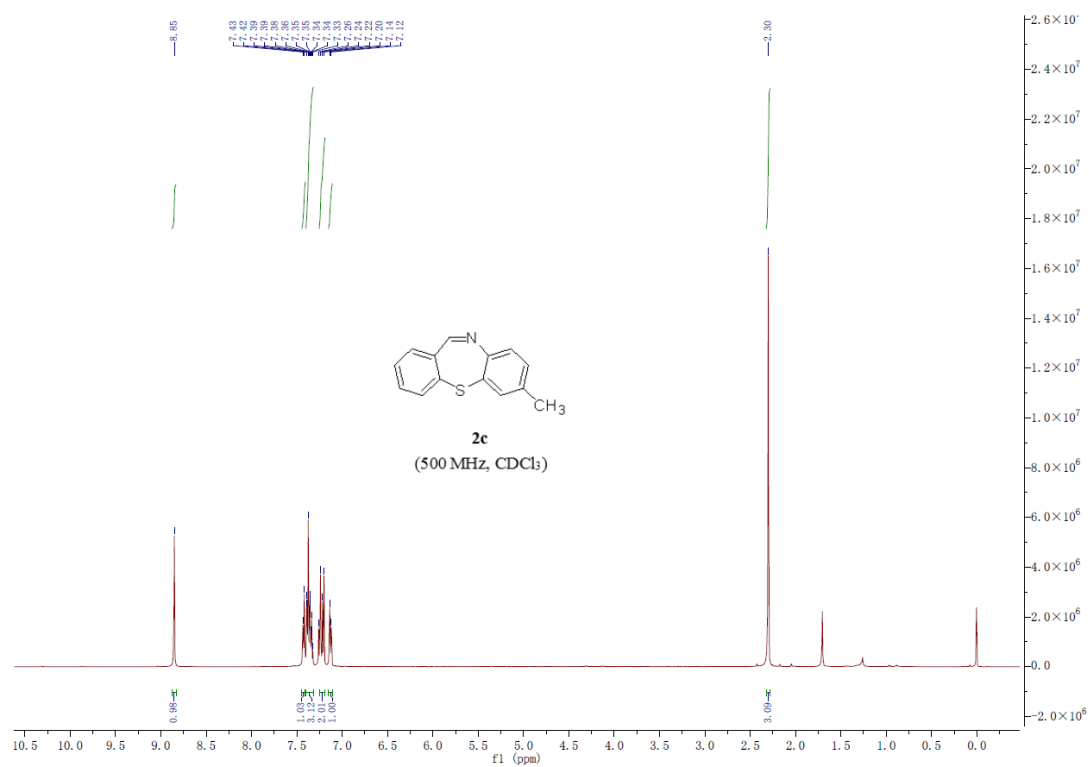

Figure S3: <sup>1</sup>H NMR (CDCl<sub>3</sub>) spectrum of Compound (**2c**)

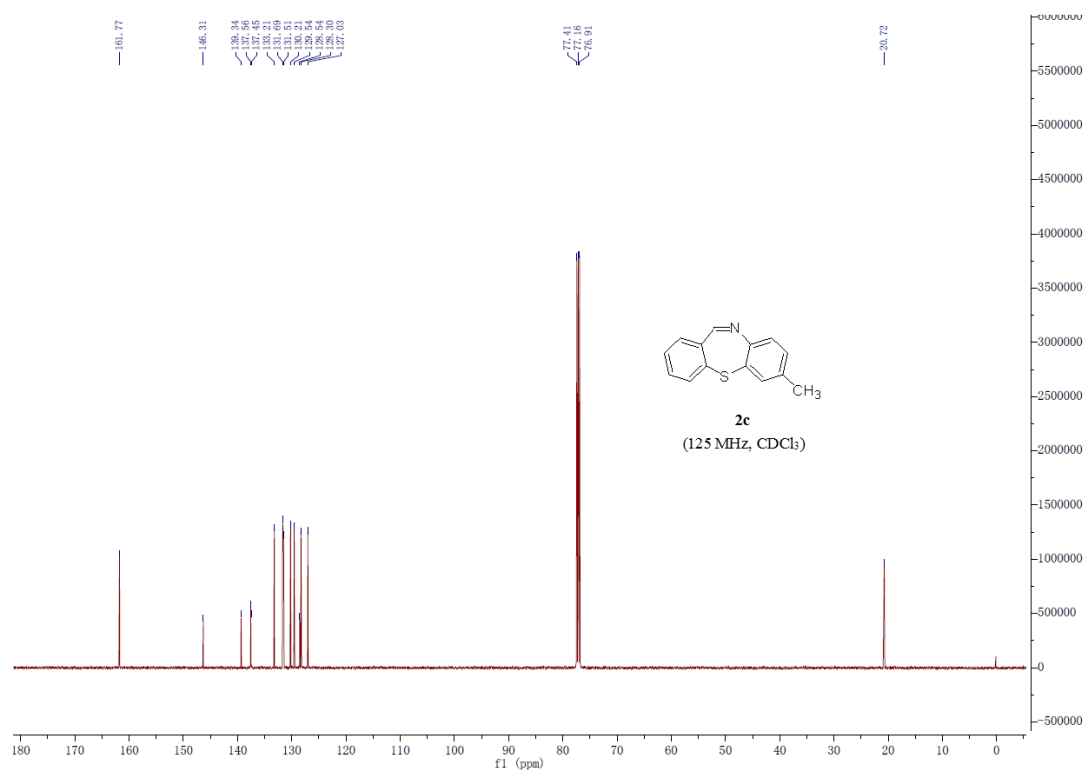

Figure S4: <sup>13</sup>C NMR (CDCl<sub>3</sub>) spectrum of Compound (**2c**)

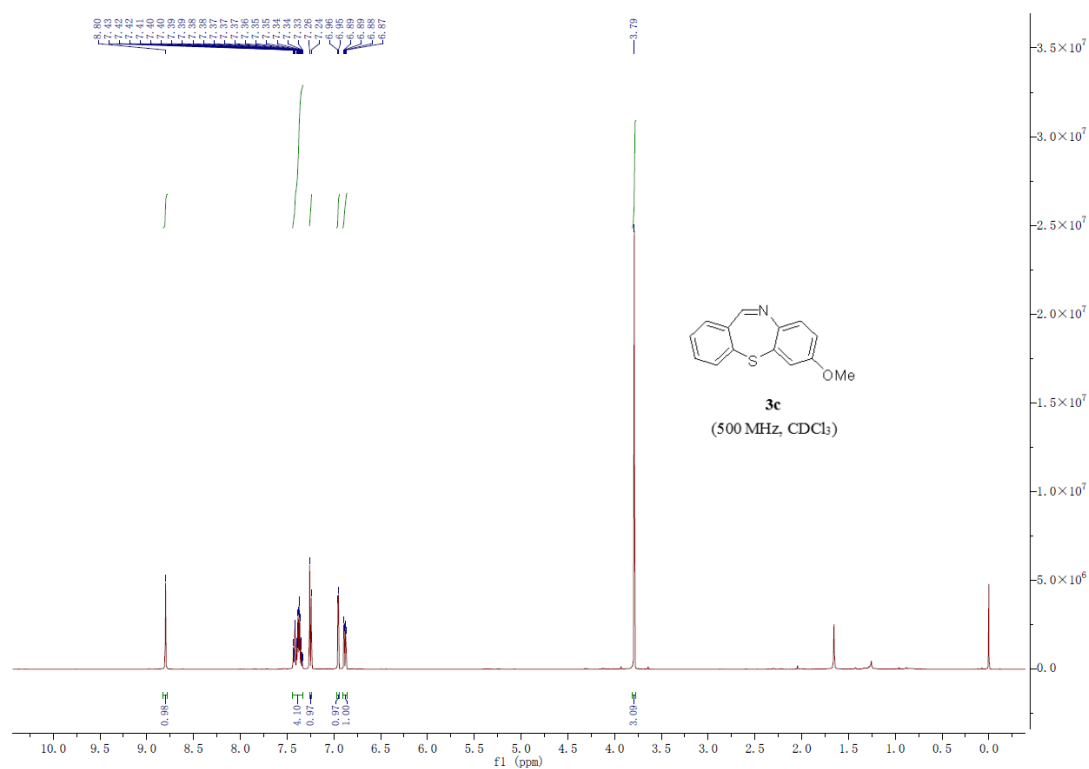

Figure S5: <sup>1</sup>H NMR (CDCl<sub>3</sub>) spectrum of Compound (**3c**)

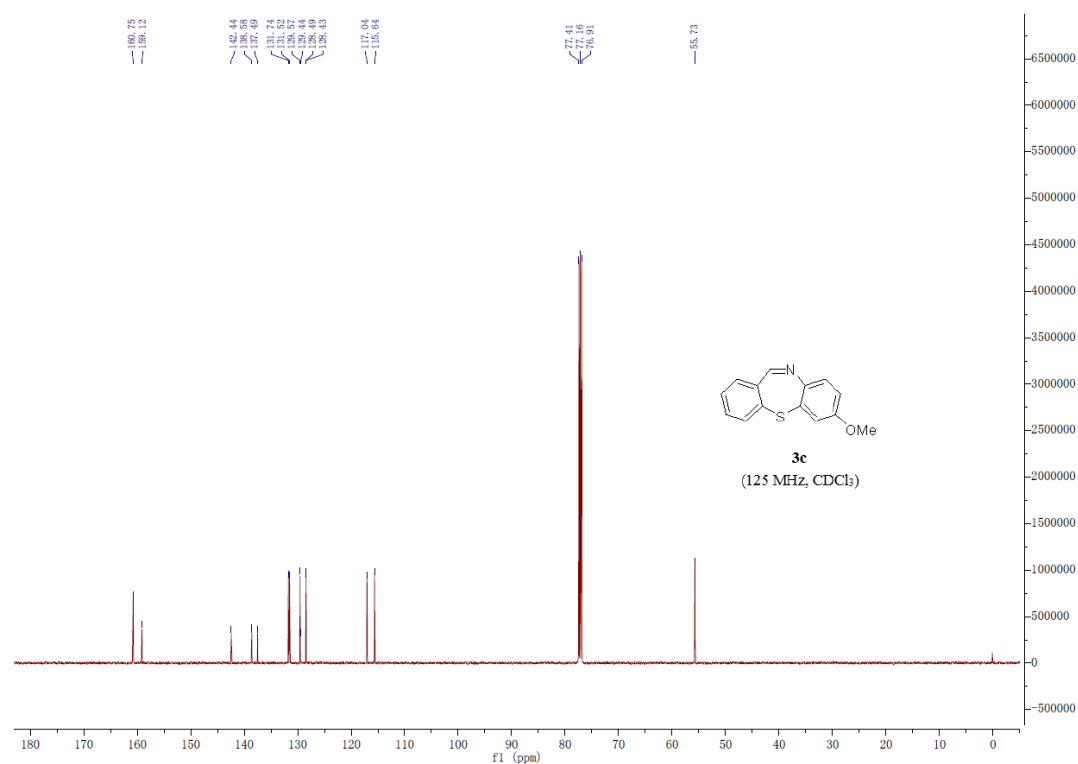

Figure S6: <sup>13</sup>C NMR (CDCl<sub>3</sub>) spectrum of Compound (**3c**)

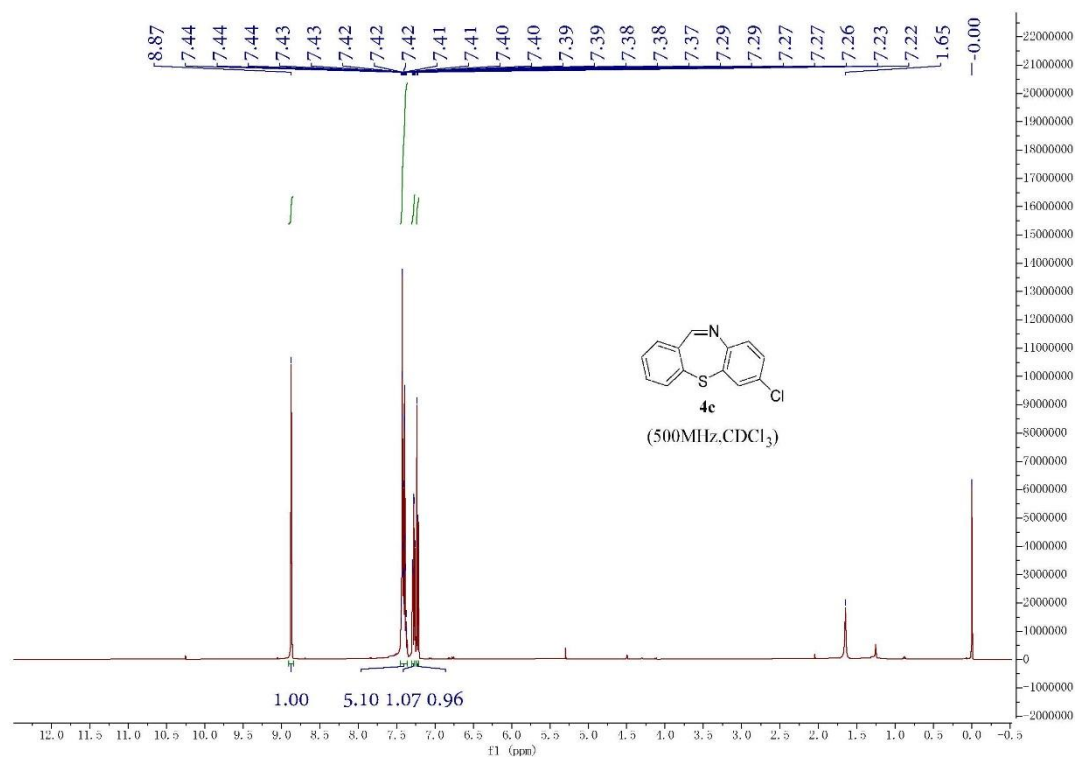

Figure S7: <sup>1</sup>H NMR (CDCl<sub>3</sub>) spectrum of Compound (**4c**)

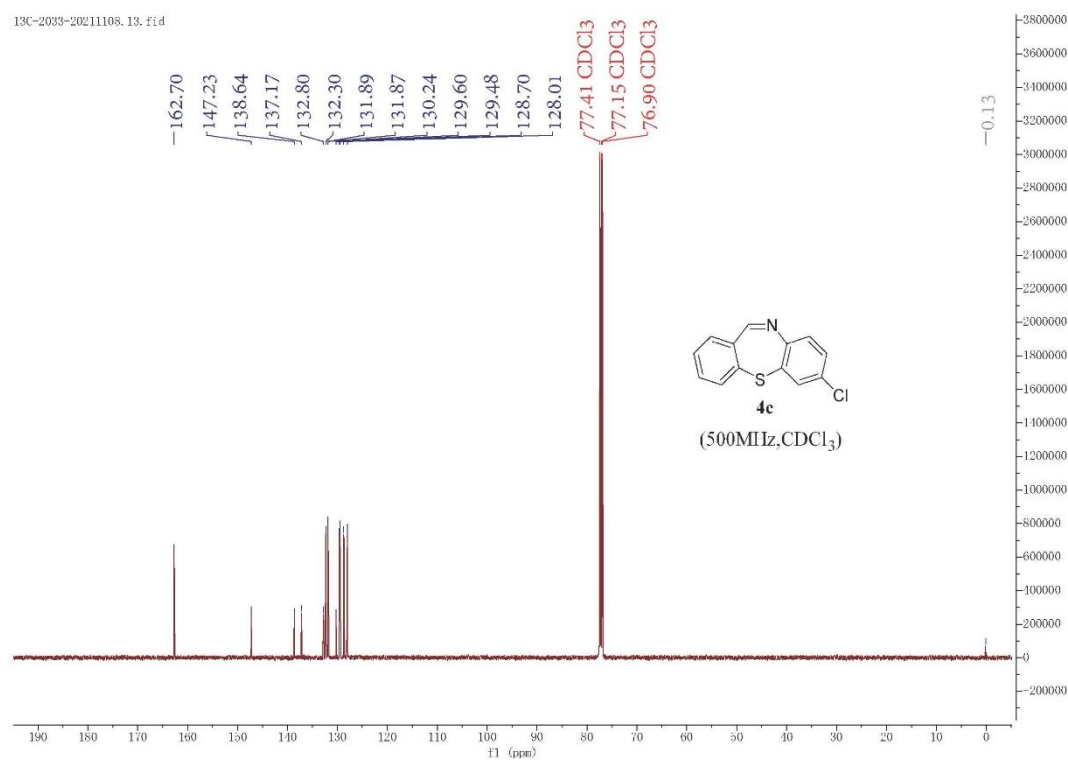

Figure S8: <sup>13</sup>C NMR (CDCl<sub>3</sub>) spectrum of Compound (**4c**)

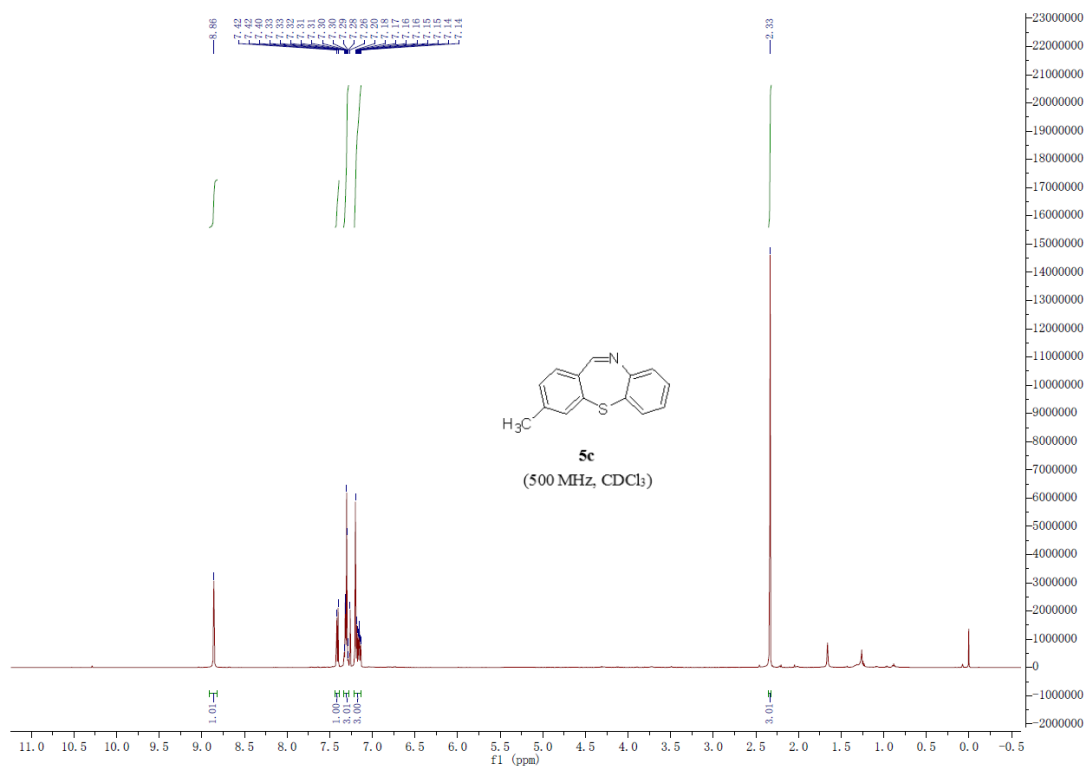

Figure S9: <sup>1</sup>H NMR (CDCl<sub>3</sub>) spectrum of Compound (**5c**)

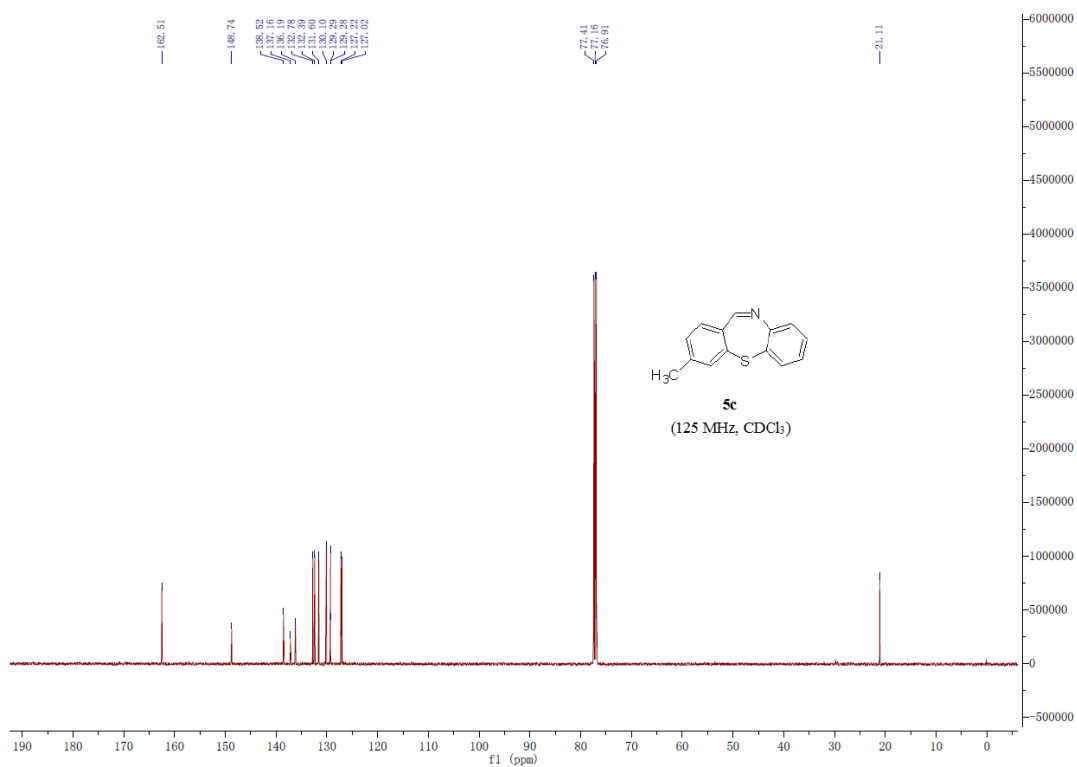

Figure S10: <sup>13</sup>C NMR (CDCl<sub>3</sub>) spectrum of Compound (**5c**)

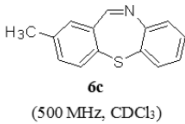

Chemical structure of **6c** is shown: Cc1ccc2c(c1)nc3ccccc3s2. The spectrum is recorded in CDCl<sub>3</sub> at 125 MHz.

6



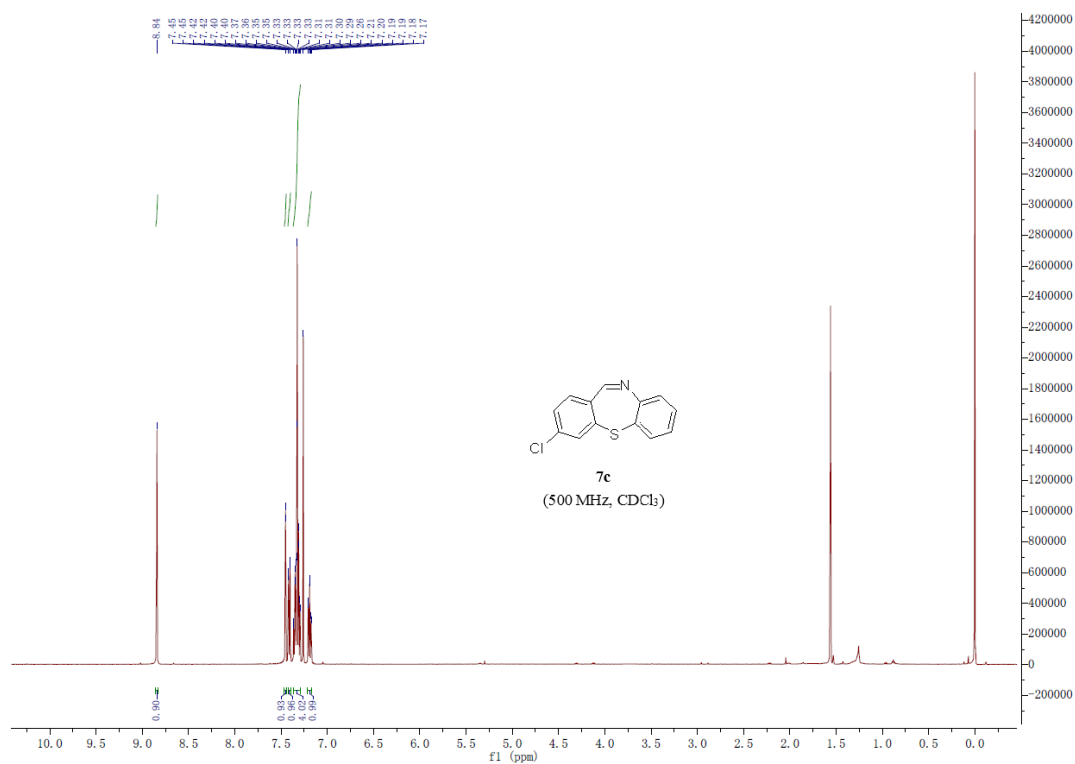

Figure S13: <sup>1</sup>H NMR (CDCl<sub>3</sub>) spectrum of Compound (**7c**)

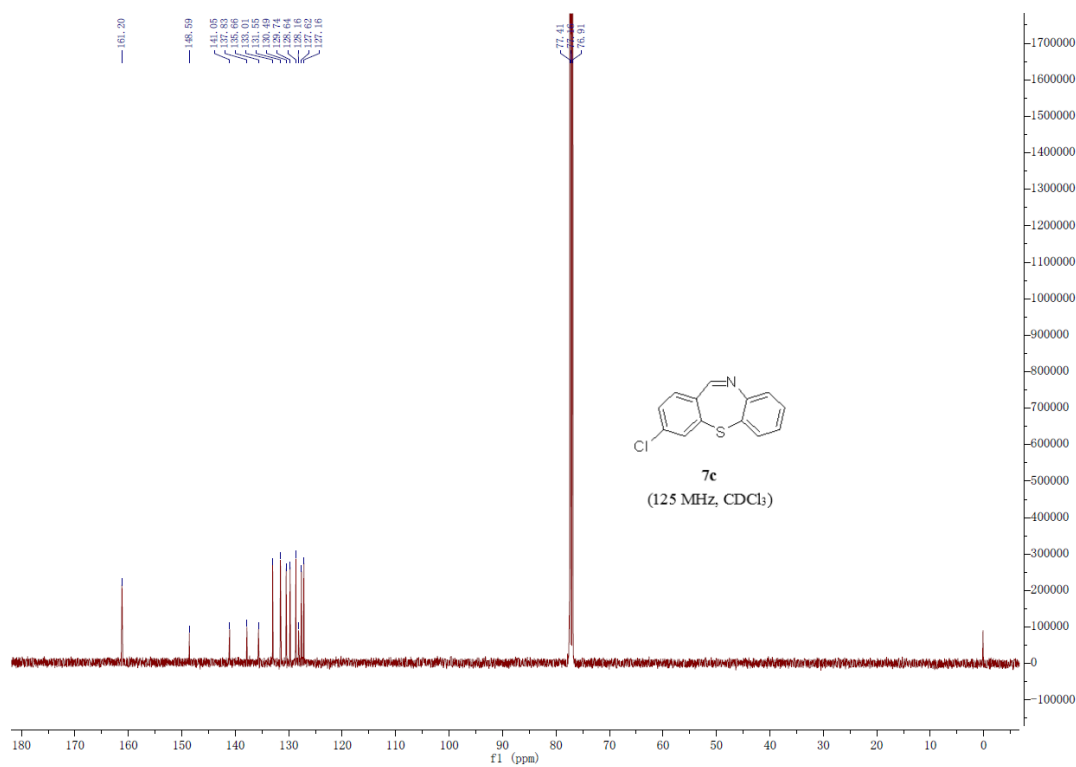

Figure S14: <sup>13</sup>C NMR (CDCl<sub>3</sub>) spectrum of Compound (**7c**)

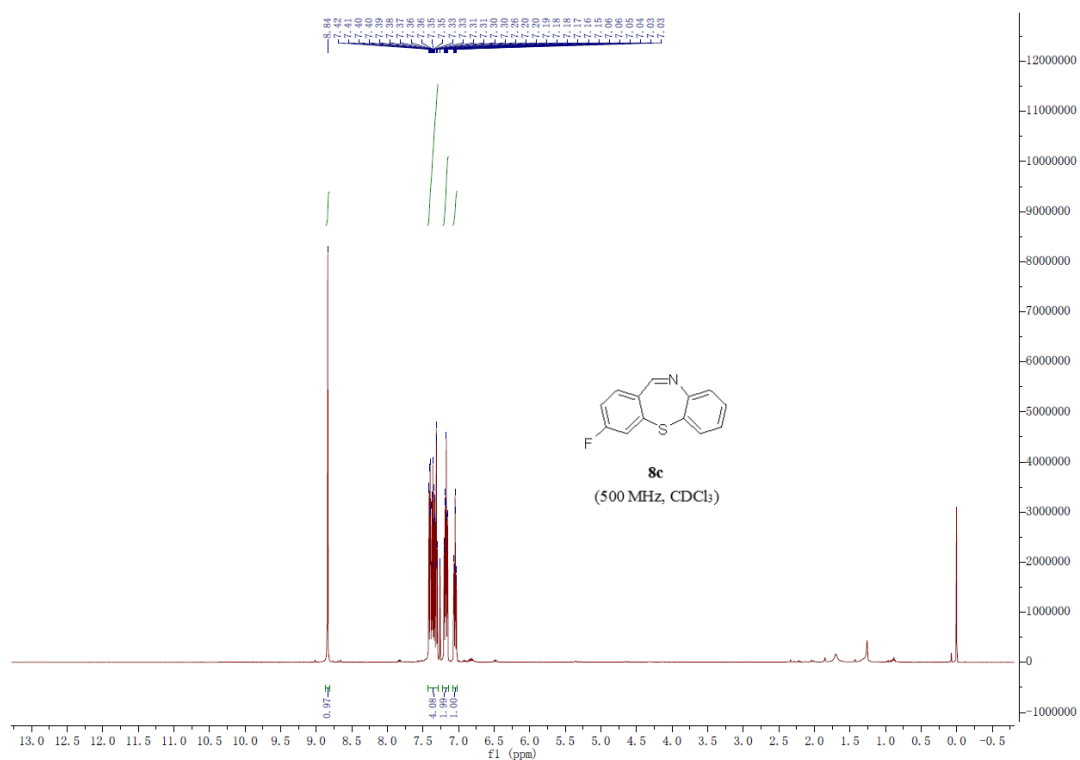

Figure S15: <sup>1</sup>H NMR (CDCl<sub>3</sub>) spectrum of Compound (**8c**)

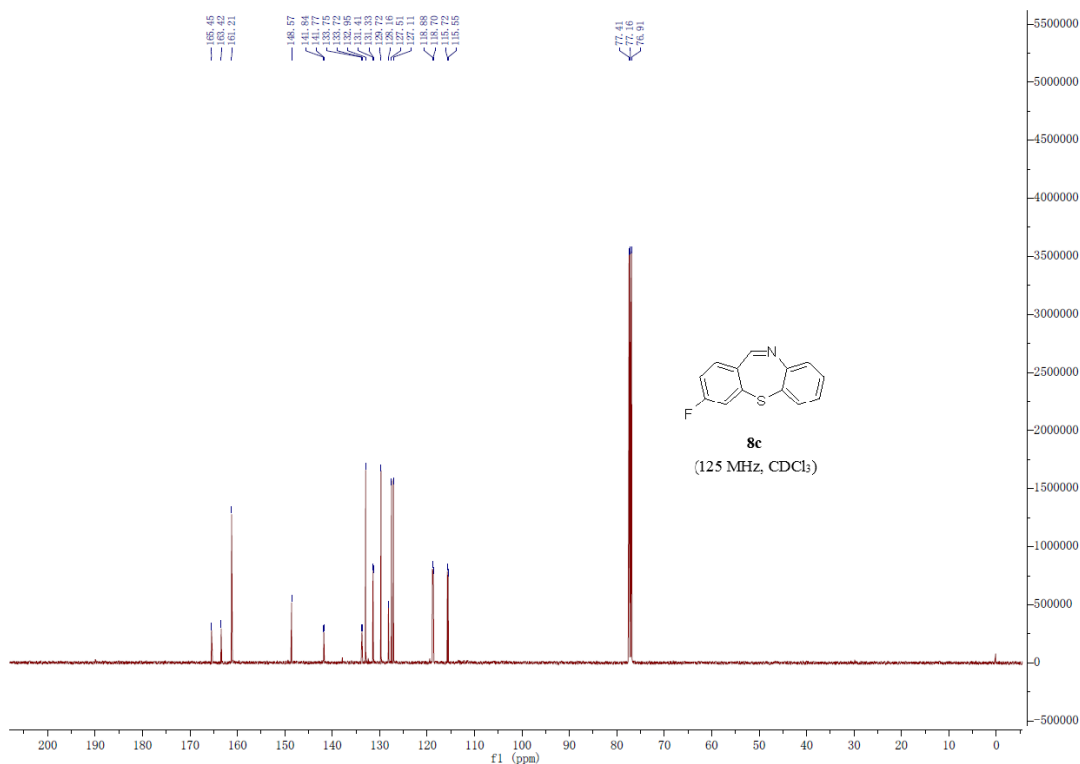

Figure S16: <sup>13</sup>C NMR (CDCl<sub>3</sub>) spectrum of Compound (**8c**)

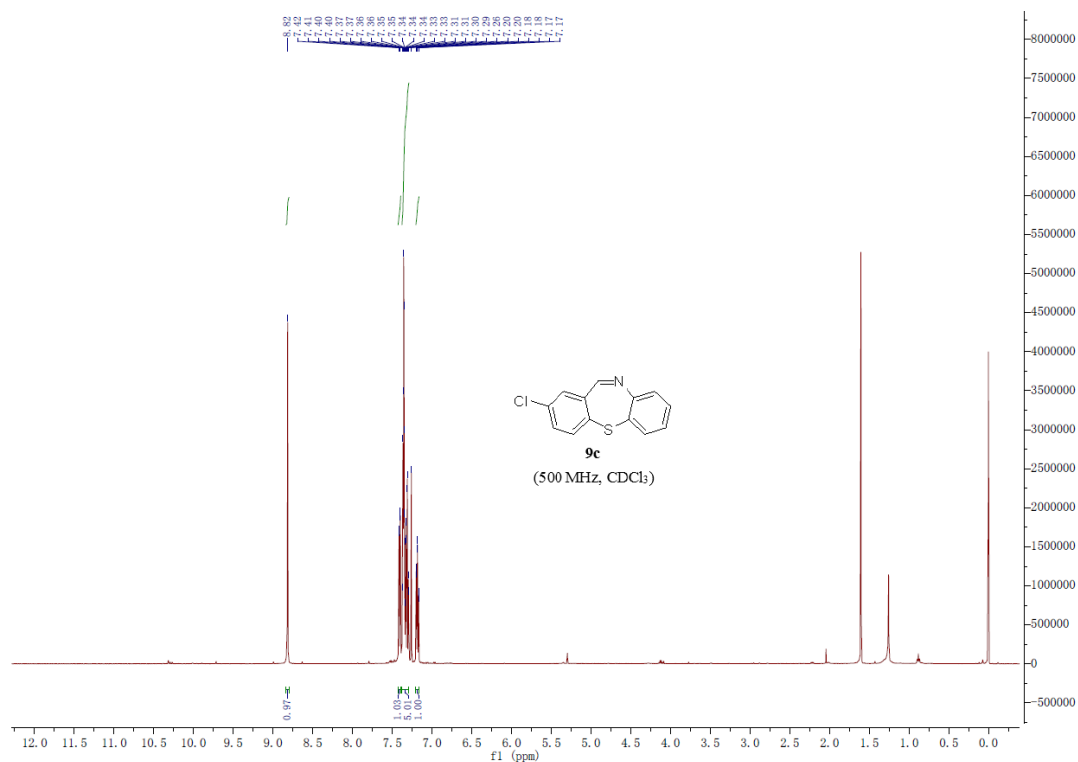

Figure S17: <sup>1</sup>H NMR (CDCl<sub>3</sub>) spectrum of Compound (**9c**)

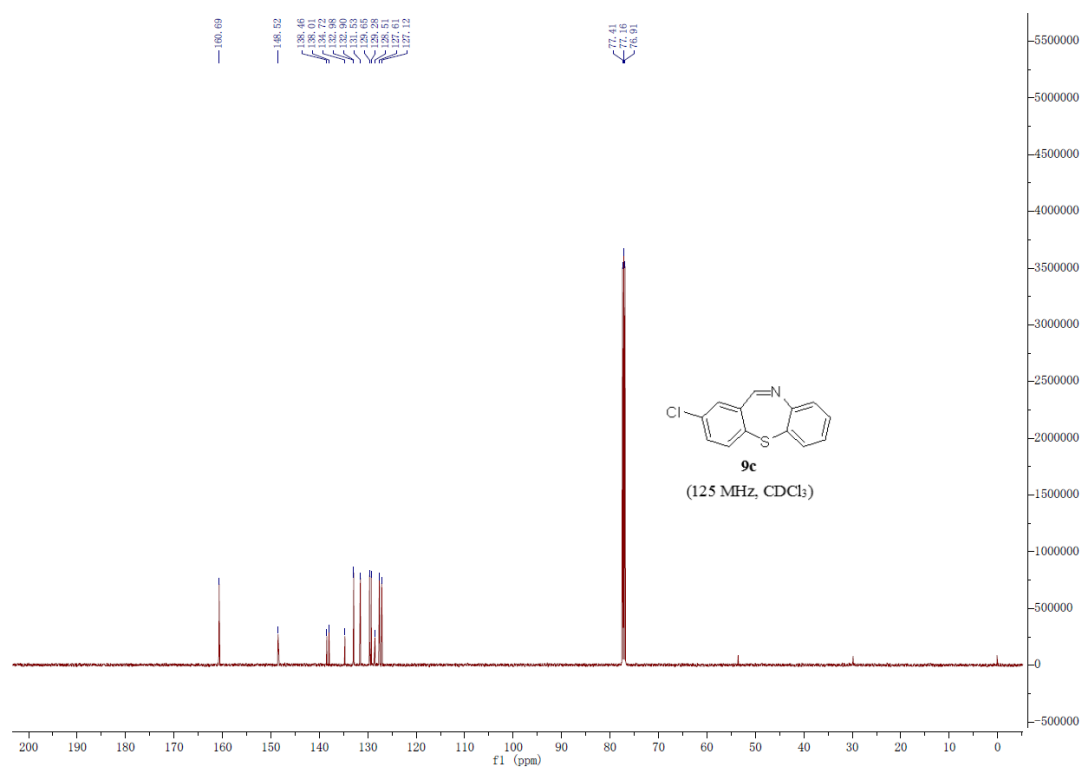

Figure S18: <sup>13</sup>C NMR (CDCl<sub>3</sub>) spectrum of Compound (**9c**)

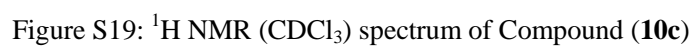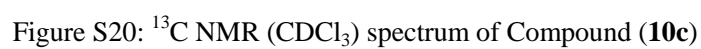

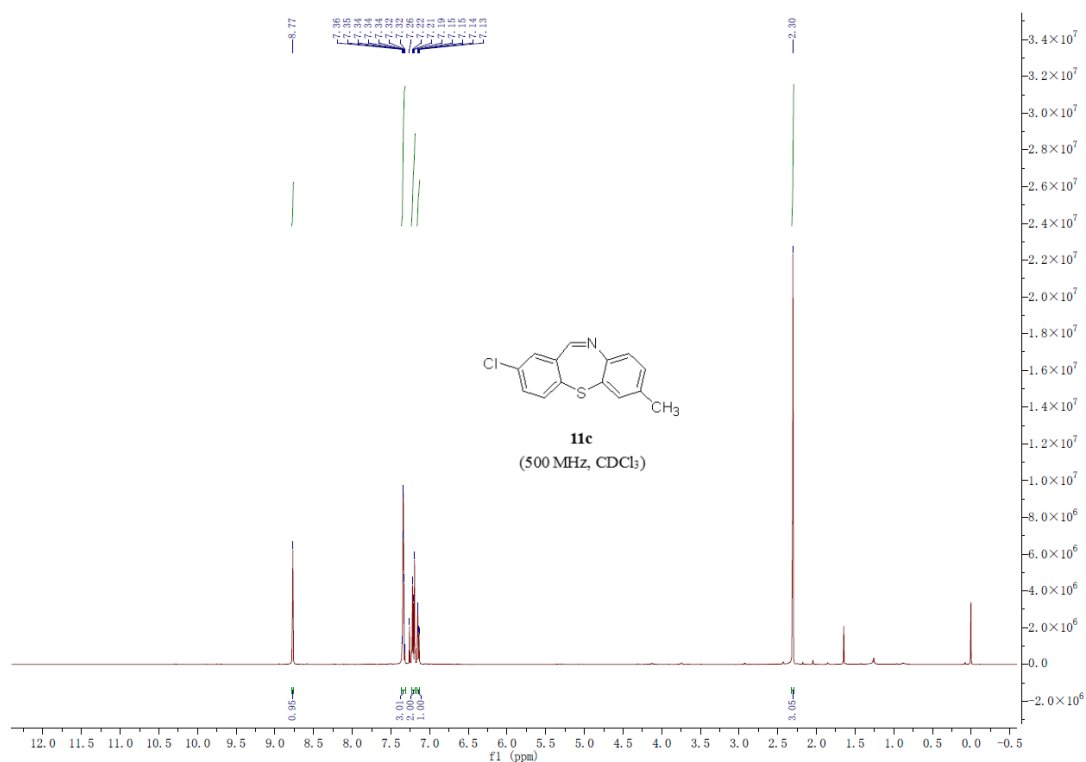

Figure S21:  $^1\text{H}$  NMR ( $\text{CDCl}_3$ ) spectrum of Compound (**11c**)

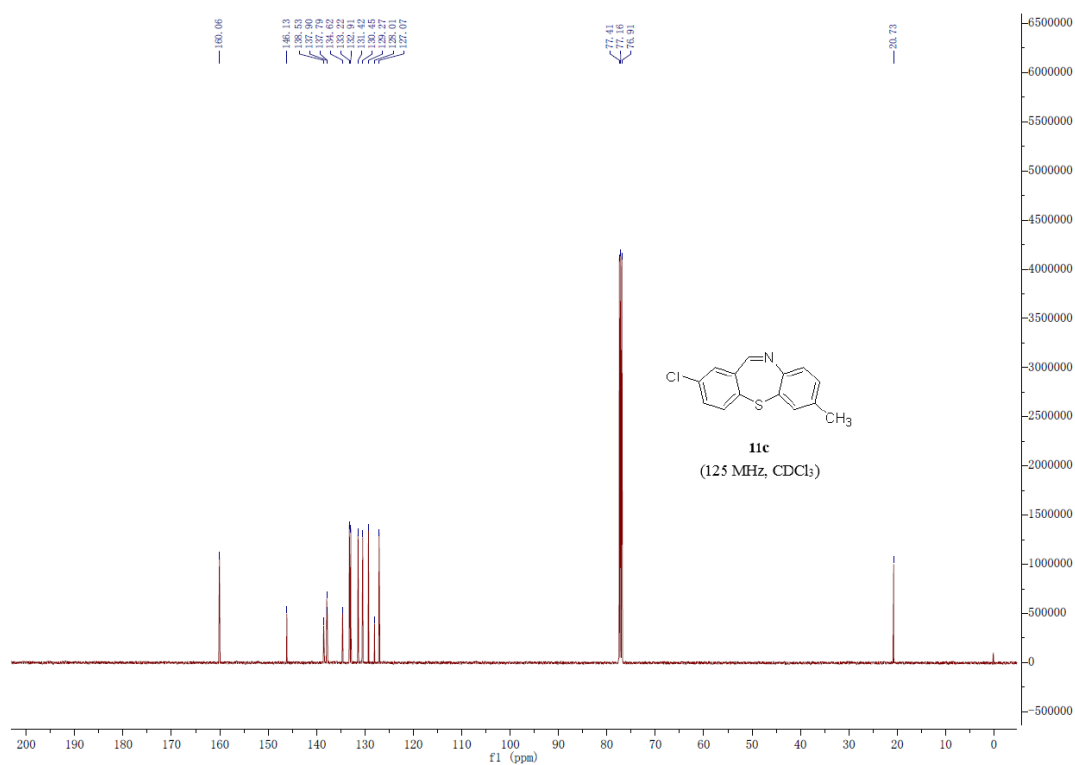

Figure S22:  $^{13}\text{C}$  NMR ( $\text{CDCl}_3$ ) spectrum of Compound (**11c**)

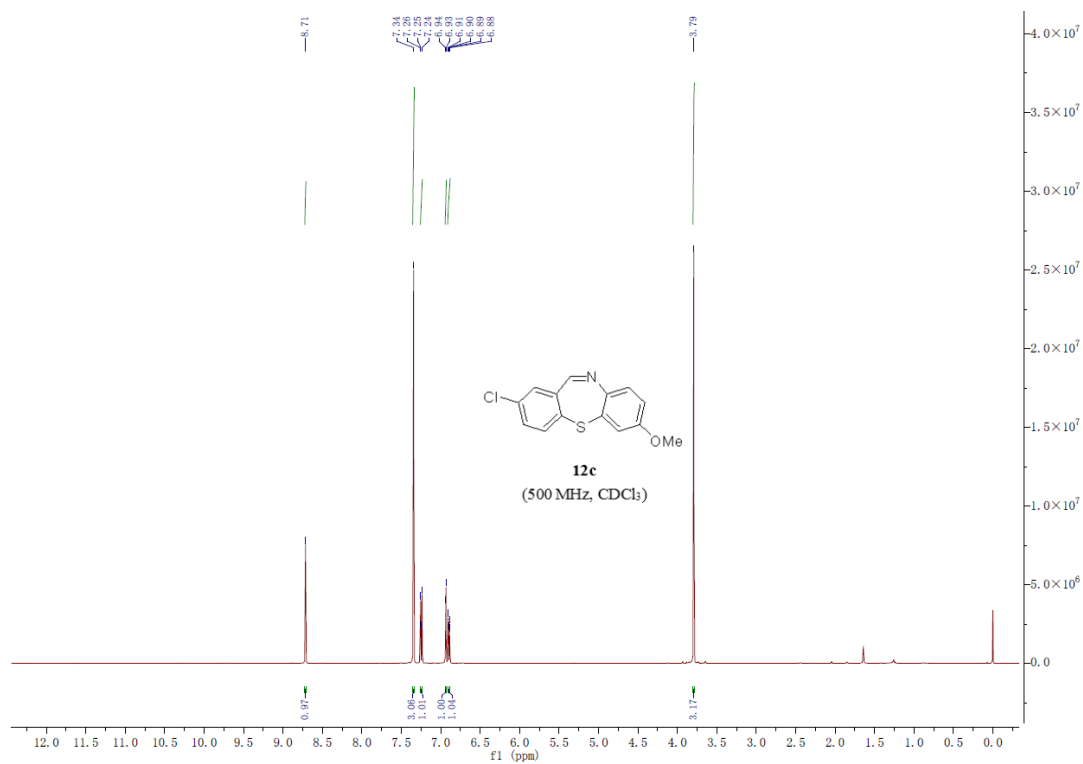

Figure S23: <sup>1</sup>H NMR (CDCl<sub>3</sub>) spectrum of Compound (**12c**)

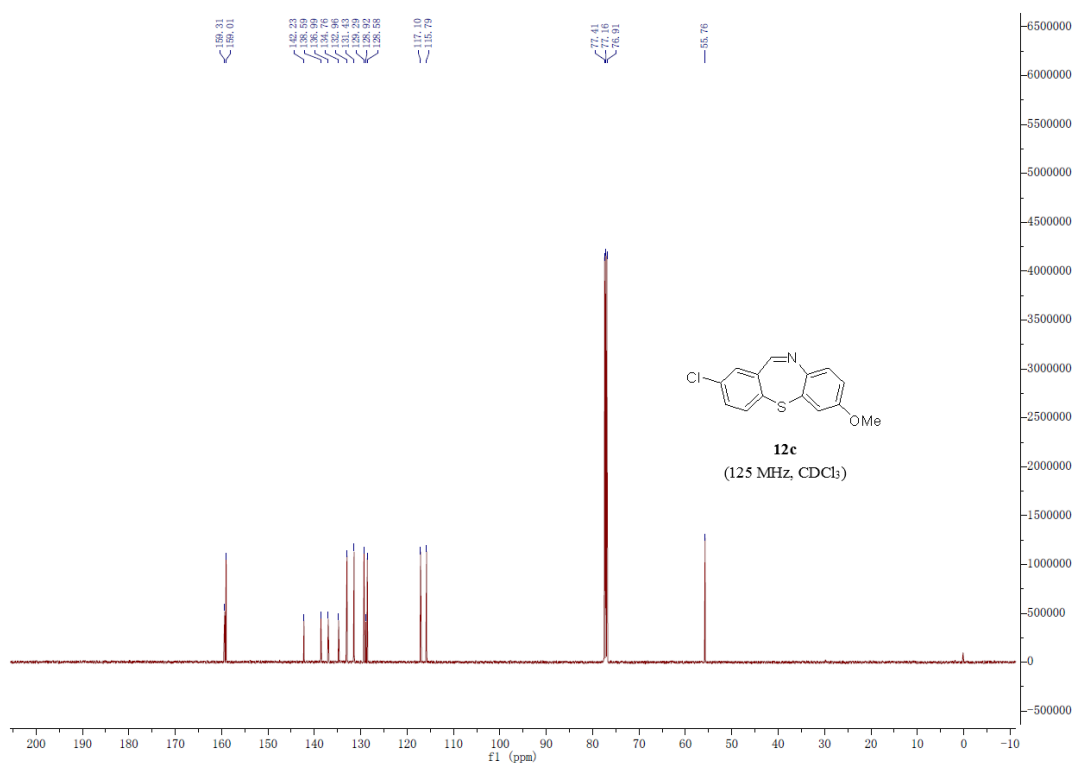

Figure S24: <sup>13</sup>C NMR (CDCl<sub>3</sub>) spectrum of Compound (**12c**)

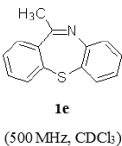

Chemical structure of **1e** (2-methyl-2,3-dihydro-1,4-benzoxazine) is shown above the spectrum.

**1e**  
(125 MHz,  $\text{CDCl}_3$ )

Peak list (ppm): 168.87, 146.78, 140.03, 138.49, 132.47, 132.40, 130.75, 129.20, 128.86, 127.98, 127.60, 77.41, 77.16, 76.91, 31.60.

13

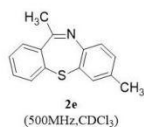

**2e**  
(125MHz, CDCl<sub>3</sub>)

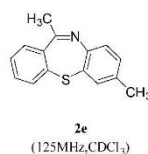

14
